# Supplementary material
Source: MDPI journal article supplement (https://www.mdpi.com/1999-4907/13/11/1816)
Supplement: s1 [file s1]

# Supplemental Materials: Total computational tables in the regression and artificial neural network

**Table S1.** The results of the MLP model for the training step

| Network           | Algorithm       | Error<br>Function | Hidden<br>activation | R <sup>2</sup> | RMSE        | %<br>RMSE    | BIAS          | % BIAS        |
|-------------------|-----------------|-------------------|----------------------|----------------|-------------|--------------|---------------|---------------|
| <b>MLP 10-9-1</b> | <b>BFGS 106</b> | <b>SOS</b>        | <b>Tanh</b>          | <b>0.48</b>    | <b>0.52</b> | <b>21.84</b> | <b>0.0008</b> | <b>0.0336</b> |
| MLP 10-6-1        | BFGS 54         | SOS               | Exponential          | 0.43           | 0.59        | 24.78        | 0.0015        | 0.0630        |
| MLP 10-4-1        | BFGS 55         | SOS               | Exponential          | 0.42           | 0.63        | 26.47        | 0.0017        | 0.0714        |
| MLP 10-7-1        | BFGS 128        | SOS               | Tanh                 | 0.46           | 0.58        | 24.36        | 0.0011        | 0.0462        |
| MLP 10-6-1        | BFGS 177        | SOS               | Logistic             | 0.44           | 0.57        | 23.94        | 0.0010        | 0.0420        |
| RBF 10-28-1       | RBFT            | SOS               | Gaussian             | 0.21           | 0.83        | 34.87        | 0.0132        | 0.5546        |
| RBF 10-21-1       | RBFT            | SOS               | Gaussian             | 0.08           | 1.31        | 55.04        | 0.244         | 10.252        |
| RBF 10-19-1       | RBFT            | SOS               | Gaussian             | 0.11           | 0.91        | 38.23        | 0.053         | 2.2268        |
| RBF 10-22-1       | RBFT            | SOS               | Gaussian             | 0.10           | 1.10        | 46.21        | 0.054         | 2.2689        |
| RBF 10-20-1       | RBFT            | SOS               | Gaussian             | 0.09           | 1.23        | 51.68        | 0.243         | 10.210        |

MLP = multilayer perceptron (10-7-1 implies 10 = number of input layers; 7 = number of hidden layers; and 1 = number of output layer)

BFGS = Broyden-Fletcher-Goldfarb-Shanno

RBFT = Radial Basis Function Training

SOS = Symbiotic Organisms search

**Table S2.** The results of the MLP model for the validation step

| Network<br>Name   | Algorithm       | Error<br>Function<br>n | Hidden<br>activation | R <sup>2</sup> | RMSE        | % RMSE       | BIAS          | % BIAS         |
|-------------------|-----------------|------------------------|----------------------|----------------|-------------|--------------|---------------|----------------|
| <b>MLP 10-9-1</b> | <b>BFGS 106</b> | <b>SOS</b>             | <b>Tanh</b>          | <b>0.44</b>    | <b>0.63</b> | <b>26.47</b> | <b>0.0010</b> | <b>0.04201</b> |
| MLP 10-6-1        | BFGS 54         | SOS                    | Exponential          | 0.41           | 0.74        | 31.09        | 0.0018        | 0.07563        |
| MLP 10-4-1        | BFGS 55         | SOS                    | Exponential          | 0.40           | 0.78        | 32.77        | 0.0021        | 0.08823        |
| MLP 10-7-1        | BFGS 128        | SOS                    | Tanh                 | 0.40           | 0.76        | 31.93        | 0.0022        | 0.09243        |
| MLP 10-6-1        | BFGS 177        | SOS                    | Logistic             | 0.42           | 0.71        | 29.83        | 0.0016        | 0.06722        |
| RBF 10-28-1       | RBFT            | SOS                    | Gaussian             | 0.11           | 1.41        | 59.24        | 0.218         | 9.15966        |
| RBF 10-21-1       | RBFT            | SOS                    | Gaussian             | 0.05           | 1.65        | 69.32        | 0.283         | 11.8907        |
| RBF 10-19-1       | RBFT            | SOS                    | Gaussian             | 0.07           | 1.59        | 66.80        | 0.261         | 10.9663        |
| RBF 10-22-1       | RBFT            | SOS                    | Gaussian             | 0.10           | 1.43        | 60.08        | 0.224         | 9.41176        |
| RBF 10-20-1       | RBFT            | SOS                    | Gaussian             | 0.05           | 1.66        | 69.74        | 0.281         | 11.8067        |

**Table S3.** Characteristics of RBF and MLP-based ANNs and associated metrics for diameter model training

| Network Name       | Algorithm       | Error Function | Hidden activation  | R <sup>2</sup> | RMSE        | % RMSE       | BIAS          | % BIAS       |
|--------------------|-----------------|----------------|--------------------|----------------|-------------|--------------|---------------|--------------|
| <b>MLP 10-11-1</b> | <b>BFGS 196</b> | <b>SOS</b>     | <b>Exponential</b> | <b>0.49</b>    | <b>0.50</b> | <b>20.92</b> | <b>0.0005</b> | <b>0.020</b> |
| MLP 10-7-1         | BFGS 80         | SOS            | Tanh               | 0.44           | 0.61        | 25.52        | 0.0019        | 0.079        |
| MLP 10-5-1         | BFGS 235        | SOS            | Logistic           | 0.42           | 0.68        | 28.45        | 0.0022        | 0.092        |
| MLP 10-5-1         | BFGS 66         | SOS            | Exponential        | 0.43           | 0.65        | 27.19        | 0.0023        | 0.096        |
| MLP 10-6-1         | BFGS 65         | SOS            | Logistic           | 0.42           | 0.69        | 28.87        | 0.0026        | 0.108        |
| RBF 10-28-1        | RBFT            | SOS            | Gaussian           | 0.17           | 0.9         | 37.69        | 0.183         | 7.656        |
| RBF 10-27-1        | RBFT            | SOS            | Gaussian           | 0.11           | 1.43        | 59.83        | 0.251         | 10.502       |
| RBF 10-24-1        | RBFT            | SOS            | Gaussian           | 0.09           | 1.89        | 79.07        | 0.198         | 8.284        |
| RBF 10-18-1        | RBFT            | SOS            | Gaussian           | 0.04           | 1.99        | 83.26        | 0.283         | 11.841       |
| RBF 10-21-1        | RBFT            | SOS            | Gaussian           | 0.20           | 0.84        | 35.14        | 0.143         | 5.983        |

**Table S4** Characteristics of RBF and MLP-based ANNs and associated metrics for diameter model evaluation

| Network Name       | Algorithm       | Error Function | Hidden activation  | R <sup>2</sup> | RMSE        | % RMSE       | BIAS          | % BIAS       |
|--------------------|-----------------|----------------|--------------------|----------------|-------------|--------------|---------------|--------------|
| <b>MLP 10-11-1</b> | <b>BFGS 196</b> | <b>SOS</b>     | <b>Exponential</b> | <b>0.44</b>    | <b>0.76</b> | <b>31.79</b> | <b>0.0019</b> | <b>0.079</b> |
| MLP 10-7-1         | BFGS 80         | SOS            | Tanh               | 0.42           | 0.79        | 33.05        | 0.0022        | 0.092        |
| MLP 10-5-1         | BFGS 235        | SOS            | Logistic           | 0.43           | 0.78        | 32.63        | 0.0022        | 0.092        |
| MLP 10-5-1         | BFGS 66         | SOS            | Exponential        | 0.41           | 0.82        | 34.30        | 0.0025        | 0.104        |
| MLP 10-6-1         | BFGS 65         | SOS            | Logistic           | 0.42           | 0.78        | 32.63        | 0.0023        | 0.096        |
| RBF 10-28-1        | RBFT            | SOS            | Gaussian           | 0.16           | 1.73        | 72.38        | 0.142         | 5.941        |
| RBF 10-27-1        | RBFT            | SOS            | Gaussian           | 0.18           | 1.53        | 64.01        | 0.129         | 5.397        |
| RBF 10-24-1        | RBFT            | SOS            | Gaussian           | 0.05           | 2.61        | 109.20       | 0.298         | 12.468       |
| RBF 10-18-1        | RBFT            | SOS            | Gaussian           | 0.03           | 2.72        | 113.80       | 0.301         | 12.594       |
| RBF 10-21-1        | RBFT            | SOS            | Gaussian           | 0.09           | 1.99        | 83.26        | 0.281         | 11.757       |
